# Supplementary material for: Novel condensation of Au-centered trigonal prisms in rare-earth-metal-rich tellurides: Er7Au2Te2 and Lu7Au2Te2
Source: Royal Society of Chemistry journal article supplement (doi:10.1039/c000650p), 2010-01-01
Supplement: c000650p.pdf [file c000650p.pdf]

**Supplementary Data**

**Novel Condensation of Au-centered Trigonal Prisms in Rare-Earth-Metal-Rich  
Tellurides: Er<sub>7</sub>Au<sub>2</sub>Te<sub>2</sub> and Lu<sub>7</sub>Au<sub>2</sub>Te<sub>2</sub>.**

Shalabh Gupta and John D. Corbett\*

Department of Chemistry, Iowa State University, Ames, Iowa 50011

**Table S1. Anisotropic displacement parameters ( $\text{\AA}^2 \times 10^3$ ) for Er<sub>7</sub>Au<sub>2</sub>Te<sub>2</sub>. The anisotropic displacement factor exponent takes the form:  $-2\pi^2 [ h^2 a^{*2} U^{11} + \dots + 2 h k a^* b^* U^{12} ]$**

|     | U <sup>11</sup> | U <sup>22</sup> | U <sup>33</sup> | U <sup>23</sup> | U <sup>13</sup> | U <sup>12</sup> |
|-----|-----------------|-----------------|-----------------|-----------------|-----------------|-----------------|
| Er1 | 16(1)           | 10(1)           | 10(1)           | 0               | 4(1)            | 0               |
| Er2 | 20(1)           | 11(1)           | 10(1)           | 0               | 6(1)            | 0               |
| Er3 | 14(1)           | 12(1)           | 12(1)           | 0               | 4(1)            | 0               |
| Er4 | 17(1)           | 10(1)           | 12(1)           | 0               | 4(1)            | 0               |
| Er5 | 16(1)           | 12(1)           | 13(1)           | 0               | 5(1)            | 0               |
| Er6 | 14(1)           | 10(1)           | 11(1)           | 0               | 5(1)            | 0               |
| Er7 | 16(1)           | 16(1)           | 9(1)            | 0               | 4(1)            | 0               |
| Er8 | 17(1)           | 12(1)           | 10(1)           | 0               | 7(1)            | 0               |
| Au1 | 17(1)           | 10(1)           | 13(1)           | 0               | 4(1)            | 0               |
| Au2 | 19(1)           | 11(1)           | 15(1)           | 0               | 6(1)            | 0               |
| Te1 | 16(1)           | 12(1)           | 11(1)           | 0               | 6(1)            | 0               |
| Te2 | 14(1)           | 9(1)            | 12(1)           | 0               | 4(1)            | 0               |

**Table S2: Bond Distances [ $\text{\AA}$ ] and  $-\text{ICOHP}$  Values (eV/bond mol) for Different Interactions in  $\text{Er}_7\text{Au}_2\text{Te}_2$  (cut off for distances is set at  $4.0 \text{ \AA}$ )**

| Interaction                  | Distance<br>( $\text{\AA}$ ) | -ICOHP<br>(eV) | Number<br>/cell |
|------------------------------|------------------------------|----------------|-----------------|
| <b>Au1–Er4<sub>cap</sub></b> | 3.659(1)                     | 0.153          | 1               |
| <b>Au1–Er3<sub>cap</sub></b> | 3.451(2)                     | 0.409          | 1               |
| <b>Au1–Er8<sub>cap</sub></b> | 3.170(1)                     | 0.763          | 1               |
| <b>Au1–Er5</b>               | 2.976(1)                     | 1.234          | 2               |
| <b>Au1–Er4</b>               | 2.948(1)                     | 1.012          | 2               |
| <b>Au1–Er6</b>               | 2.896(1)                     | 0.984          | 2               |
| <b>Au2–Er5<sub>cap</sub></b> | 3.733(1)                     | 0.110          | 1               |
| <b>Au2–Er2<sub>cap</sub></b> | 3.550(1)                     | 0.476          | 1               |
| <b>Au2–Er7<sub>cap</sub></b> | 3.042(1)                     | 0.770          | 1               |
| <b>Au2–Er2</b>               | 2.979(1)                     | 1.024          | 2               |
| <b>Au2–Er1</b>               | 2.908(1)                     | 0.924          | 2               |
| <b>Au2–Er3</b>               | 2.879(1)                     | 1.096          | 2               |
| <b>Er1–Er2</b>               | 3.960(2)                     | 0.107          | 1               |
| <b>Er1–Er5</b>               | 3.872(2)                     | 0.053          | 2               |
| <b>Er1–Er7</b>               | 3.452(1)                     | 0.179          | 2               |
| <b>Er1–Er3</b>               | 3.448(2)                     | 0.139          | 1               |
| <b>Er2–Er3</b>               | 3.608(2)                     | 0.218          | 2               |
| <b>Er2–Er7</b>               | 3.635(1)                     | 0.147          | 1               |
| <b>Er2–Er3</b>               | 3.676(2)                     | 0.181          | 1               |
| <b>Er2–Er2</b>               | <b>3.685(2)</b>              | <b>0.268</b>   | <b>2</b>        |
| <b>Er3–Er5</b>               | 3.449(2)                     | 0.249          | 2               |

|                |          |       |   |
|----------------|----------|-------|---|
| <b>Er3–Er6</b> | 3.555(2) | 0.145 | 2 |
| <b>Er4–Er8</b> | 3.594(1) | 0.162 | 2 |
| <b>Er4–Er4</b> | 3.632(2) | 0.168 | 2 |
| <b>Er4–Er6</b> | 3.718(2) | 0.105 | 1 |
| <b>Er4–Er6</b> | 3.898(2) | 0.030 | 2 |
| <b>Er4–Er5</b> | 3.920(2) | 0.119 | 1 |
| <b>Er5–Er8</b> | 3.498(1) | 0.264 | 2 |
| <b>Er5–Er6</b> | 3.592(2) | 0.246 | 1 |
| <b>Te1–Er6</b> | 3.023(2) | 0.723 | 1 |
| <b>Te1–Er1</b> | 3.030(1) | 0.698 | 1 |
| <b>Te1–Er8</b> | 3.043(2) | 1.024 | 1 |
| <b>Te1–Er5</b> | 3.143(2) | 0.765 | 2 |
| <b>Te1–Er4</b> | 3.154(2) | 0.709 | 2 |
| <b>Te2–Er3</b> | 3.071(2) | 0.812 | 1 |
| <b>Te2–Er1</b> | 3.134(2) | 0.602 | 2 |
| <b>Te2–Er7</b> | 3.154(2) | 0.692 | 1 |
| <b>Te2–Er2</b> | 3.201(2) | 0.677 | 2 |
| <b>Te2–Er6</b> | 3.213(2) | 0.513 | 2 |
| <b>Au1–Au1</b> | 3.982(2) | 0.029 | 2 |
| <b>Au2–Au2</b> | 3.982(2) | 0.027 | 2 |

**Table S3. Complete list of distances (Å) in Er<sub>7</sub>Au<sub>2</sub>Te<sub>2</sub> <4.0 Å.**

|     |     |        |     |     |        |     |     |        |
|-----|-----|--------|-----|-----|--------|-----|-----|--------|
| Er1 | Au2 | 2.9080 |     | Er6 | 3.8976 |     | Er5 | 3.4984 |
|     | Au2 | 2.9080 |     | Er6 | 3.8976 |     | Er5 | 3.4984 |
|     | Te1 | 3.0298 |     | Er5 | 3.9197 |     | Er5 | 3.4984 |
|     | Te2 | 3.1344 |     | Er4 | 3.9820 |     | Er4 | 3.5943 |
|     | Te2 | 3.1344 |     | Er4 | 3.9820 |     | Er4 | 3.5943 |
|     | Er3 | 3.4481 | Er5 | Au1 | 2.9762 |     | Er4 | 3.5943 |
|     | Er7 | 3.4523 |     | Au1 | 2.9762 |     | Er4 | 3.5943 |
|     | Er7 | 3.4523 |     | Te1 | 3.1432 |     | Er8 | 3.9820 |
|     | Er5 | 3.8718 |     | Te1 | 3.1432 |     | Er8 | 3.9820 |
|     | Er5 | 3.8718 |     | Er3 | 3.4492 | Au1 | Er6 | 2.8964 |
|     | Er2 | 3.9603 |     | Er3 | 3.4492 |     | Er6 | 2.8964 |
|     | Er1 | 3.9820 |     | Er8 | 3.4984 |     | Er4 | 2.9484 |
|     | Er1 | 3.9820 |     | Er8 | 3.4984 |     | Er4 | 2.9484 |
| Er2 | Au2 | 2.9792 |     | Er6 | 3.5921 |     | Er5 | 2.9762 |
|     | Au2 | 2.9792 |     | Au2 | 3.7335 |     | Er5 | 2.9762 |
|     | Te2 | 3.2007 |     | Er1 | 3.8718 |     | Er8 | 3.1698 |
|     | Te2 | 3.2007 |     | Er1 | 3.8718 |     | Er3 | 3.4504 |
|     | Au2 | 3.5499 |     | Er4 | 3.9197 |     | Er4 | 3.6588 |
|     | Er3 | 3.6079 |     | Er5 | 3.9820 |     | Au1 | 3.9820 |
|     | Er3 | 3.6079 |     | Er5 | 3.9820 |     | Au1 | 3.9820 |
|     | Er7 | 3.6353 | Er6 | Au1 | 2.8964 | Au2 | Er3 | 2.8790 |
|     | Er7 | 3.6353 |     | Au1 | 2.8964 |     | Er3 | 2.8790 |
|     | Er3 | 3.6761 |     | Te1 | 3.0232 |     | Er1 | 2.9080 |
|     | Er2 | 3.6852 |     | Te2 | 3.2132 |     | Er1 | 2.9080 |
|     | Er2 | 3.6852 |     | Te2 | 3.2132 |     | Er2 | 2.9792 |
|     | Er1 | 3.9603 |     | Er3 | 3.5547 |     | Er2 | 2.9792 |
|     | Er2 | 3.9820 |     | Er3 | 3.5547 |     | Er7 | 3.0418 |
|     | Er2 | 3.9820 |     | Er5 | 3.5921 |     | Er2 | 3.5499 |
| Er3 | Au2 | 2.8790 |     | Er4 | 3.7184 |     | Er5 | 3.7335 |
|     | Au2 | 2.8790 |     | Er4 | 3.8976 |     | Au2 | 3.9820 |
|     | Te2 | 3.0710 |     | Er4 | 3.8976 |     | Au2 | 3.9820 |
|     | Er1 | 3.4481 |     | Er6 | 3.9820 | Te1 | Er6 | 3.0232 |
|     | Er5 | 3.4492 |     | Er6 | 3.9820 |     | Er1 | 3.0298 |
|     | Er5 | 3.4492 | Er7 | Au2 | 3.0418 |     | Er8 | 3.0428 |
|     | Au1 | 3.4504 |     | Au2 | 3.0418 |     | Er5 | 3.1432 |
|     | Er6 | 3.5547 |     | Te2 | 3.1535 |     | Er5 | 3.1432 |
|     | Er6 | 3.5547 |     | Te2 | 3.1535 |     | Er4 | 3.1536 |
|     | Er2 | 3.6079 |     | Er1 | 3.4523 |     | Er4 | 3.1536 |
|     | Er2 | 3.6079 |     | Er1 | 3.4523 |     | Te1 | 3.9820 |
|     | Er2 | 3.6761 |     | Er1 | 3.4523 |     | Te1 | 3.9820 |
|     | Er3 | 3.9820 |     | Er1 | 3.4523 | Te2 | Er3 | 3.0710 |
|     | Er3 | 3.9820 |     | Er2 | 3.6353 |     | Er1 | 3.1344 |
| Er4 | Au1 | 2.9484 |     | Er2 | 3.6353 |     | Er1 | 3.1344 |
|     | Au1 | 2.9484 |     | Er2 | 3.6353 |     | Er7 | 3.1535 |
|     | Te1 | 3.1536 |     | Er2 | 3.6353 |     | Er2 | 3.2007 |
|     | Te1 | 3.1536 |     | Er7 | 3.9820 |     | Er2 | 3.2007 |
|     | Er8 | 3.5943 |     | Er7 | 3.9820 |     | Er6 | 3.2132 |
|     | Er8 | 3.5943 | Er8 | Te1 | 3.0428 |     | Er6 | 3.2132 |
|     | Er4 | 3.6318 |     | Te1 | 3.0428 |     | Te2 | 3.9820 |
|     | Er4 | 3.6318 |     | Au1 | 3.1698 |     | Te2 | 3.9820 |
|     | Au1 | 3.6588 |     | Au1 | 3.1698 |     |     |        |
|     | Er6 | 3.7184 |     | Er5 | 3.4984 |     |     |        |

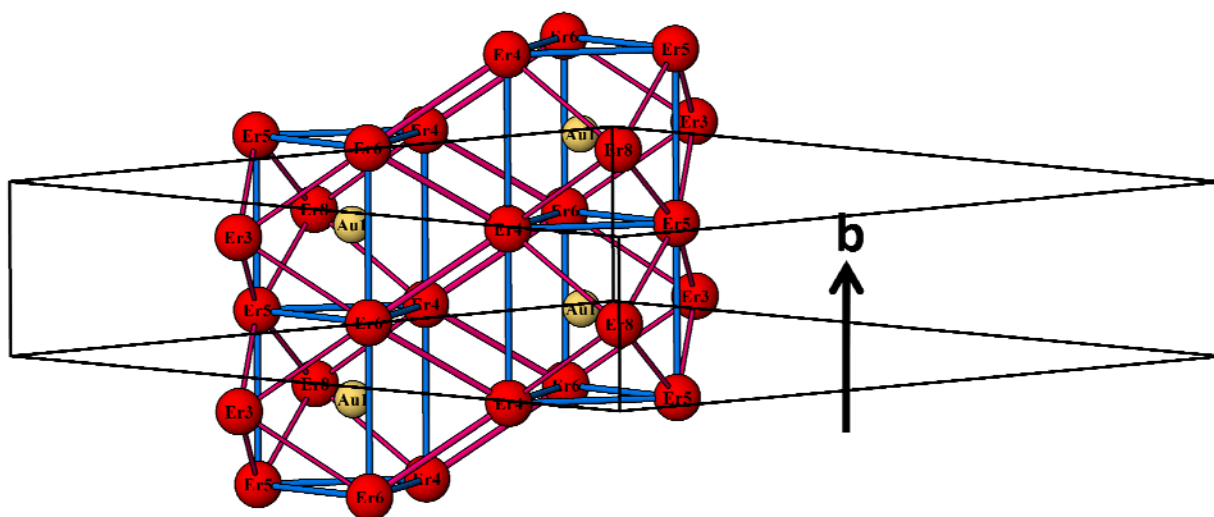

Fig. S1. Side view of the condensation of tricapped trigonal prisms of Er in  $\text{Er}_7\text{Au}_2\text{Te}_2$ .  
The prismatic–face-capping connections are marked in red.

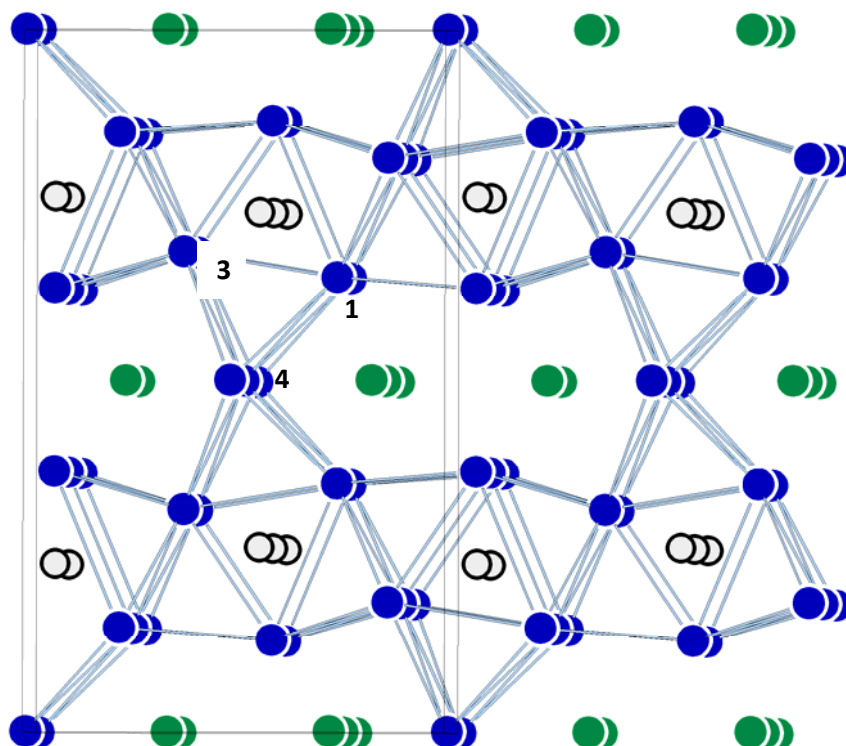

Fig. S2. Projection of the orthorhombic (*Imm2*)  $\text{Dy}_7\text{Ir}_2\text{Te}_2$  structure along the short *a* axis. Note the distorted Dy configuration around the  $\text{Dy}_4$  atoms that interbridge the horizontal puckered sheets of condensed Ir-centered TCTP of Dy. (*c* is horizontal.)
